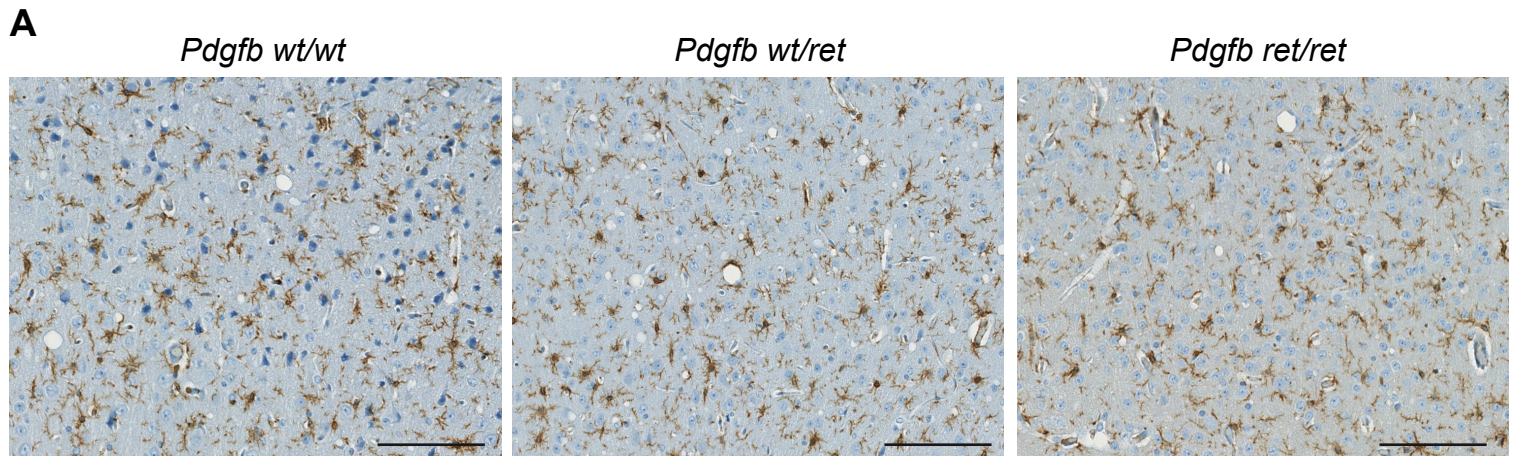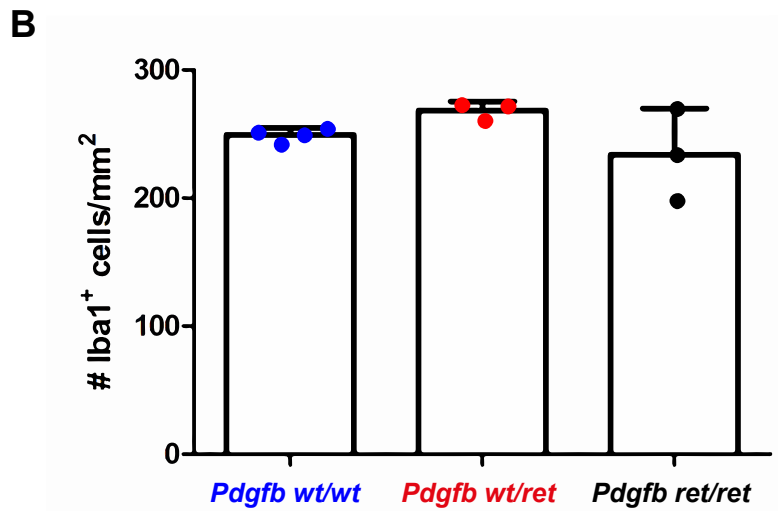

Source: https://storage.googleapis.com/plos-corpus-prod/10.1371/journal.ppat.1007424/1/ppat.1007424.s003.pdf
